# Supplementary material for: Synthesis of micro- and mesoporous molecular sieves at room temperature and neutral pH catalyzed by functional analogues of silicatein
Source: Royal Society of Chemistry journal article supplement (doi:10.1039/b605909k), 2006-01-01

### Supplementary Information

**Figure 1:** UV-vis DRS spectra of Ti-mesoporous materials:

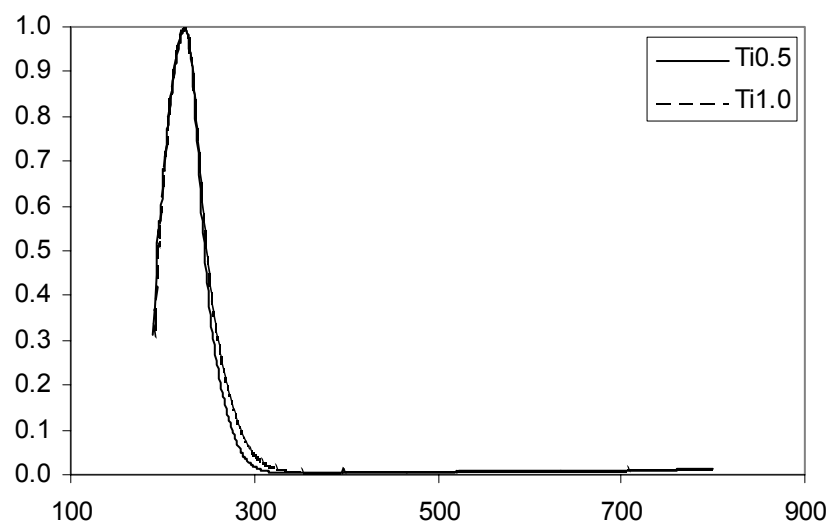

**Figure 2.** Infrared spectra of the as-made microporous material obtained with tromethamine and ethanolamine

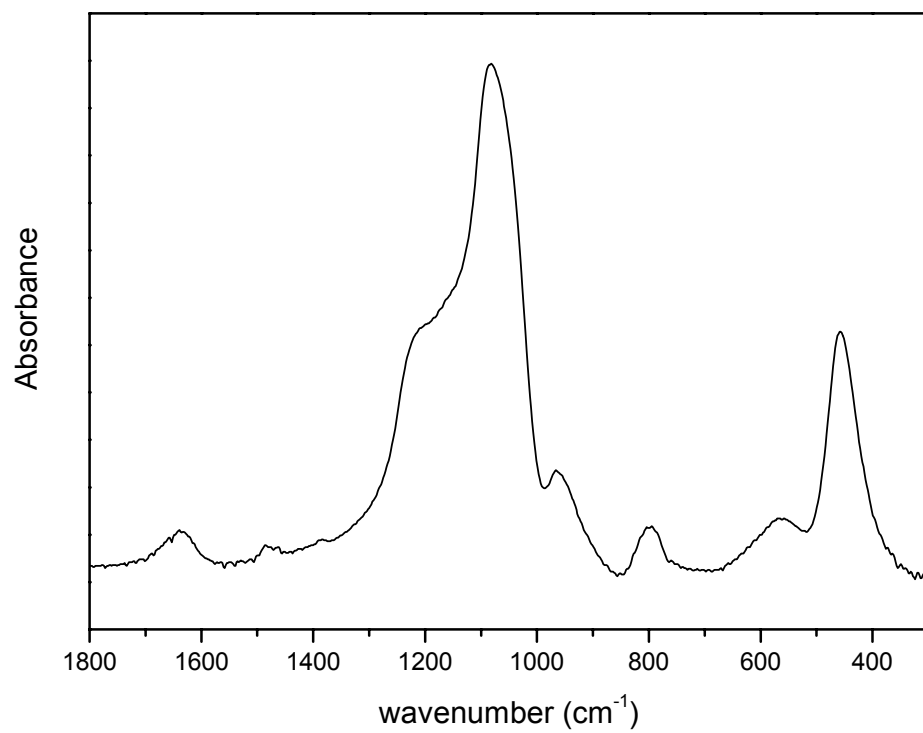

**Figure 3.**  $^{29}\text{Si}$  MAS NMR spectra of the calcined microporous material obtained with tromethamine and ethanolamine. From top to bottom: spectrum of the calcined material, simulation with deconvoluted components and individual deconvoluted components.

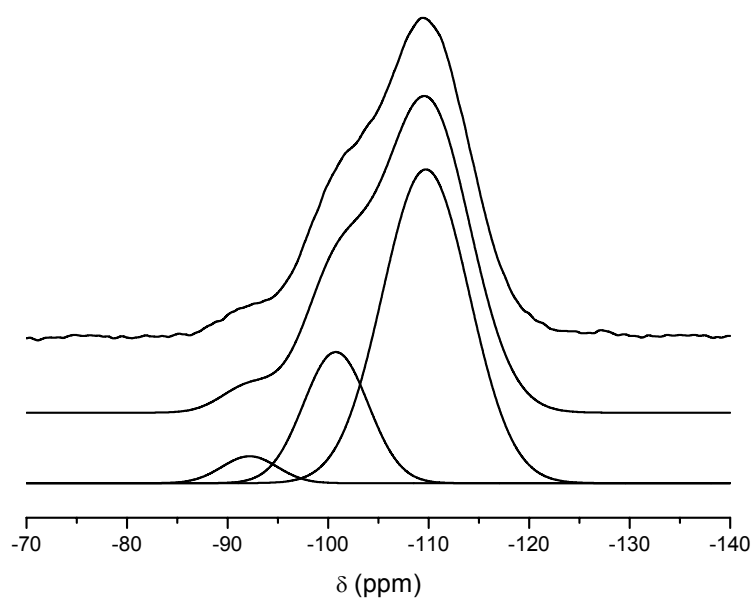

**Figure 4:** Rate of hydrolysis of TEOS with different catalysts.

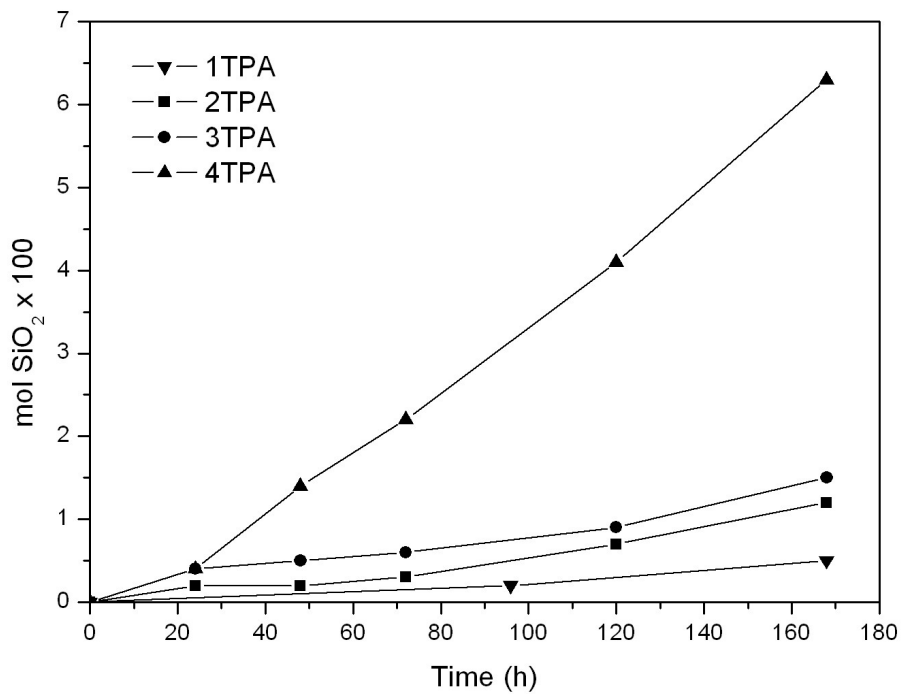

Supplement: b605909k.pdf [file b605909k.pdf]
